# Supplementary material for: Development of international criteria for a front of package food labelling system: the International Choices Programme
Source: Springer Nature journal article supplement (doi:10.1038/ejcn.2011.101), 2011-06-22
Supplement: ejcn2011101x5.doc [file ejcn2011101x5.doc]

**Appendix 4.**

**Overview of product group descriptions, criteria and rationales**

***Development of international criteria for a front of package food labelling system: international Choices Programme***

**INTRODUCTION**

The detailed rationales below refer to the set of nutrient profiles that have been defined for the Choices programme in the paper: “Development of international criteria for a front of package food labelling system: international Choices Programme”. ***Table 1 and 2*** show the overview of these nutrient profiles: including descriptions of the product groups and the specific criteria.

***Table 1. Overview of generic1 and product group specific criteria, including description of basic product groups2***

| ***Product group2*** | ***Overview Choices criteria3,4*** |
| --- | --- |
| **Fresh or fresh frozen fruit, vegetables and legumes**  All types of fresh fruit, vegetables, and potatoes without additives, including freshly frozen and/or sliced fruit & vegetables. *Pre-cut leek, pre-sliced melon, cucumber, broccoli, deep-frozen spinach (without added cream), raspberries.* | All products without additives comply |
| **Processed fruit & vegetables**  All types of processed fruit & vegetables, with the exception of fruit juices and frozen or pre-sliced fruit & vegetables without further processing. *E.g.: tinned tomatoes, tinned carrots, tinned kidney beans, deep-frozen spinach à la crème, deep-frozen vegetables, tomato juice, dried lentils,*  *pickles, mixed vegetable juices, dried apricots or figs, pine on juice, fruit cocktail in own juice or syrup, apple sauce, candied dates, strawberry purée, olives, mixed fruit & vegetable purées or juices.* | SAFA: ≤ 1.1 g/100g  TFA: ≤ 0.1 g/100g  Sodium: ≤ 100mg/100g  Added sugar: not added  Fibre: ≥ 1.3 g/100kcal5 |
| **Fruit Juices**  All kinds of fruit juices with a minimum of 98% own juice. *Orange juice, apple juice, multi-fruit juice.* | SAFA: ≤ 1.1 g/100g  TFA: ≤ 0.1 g/100g  Sodium: ≤ 100mg/100g  Added sugar: not added  Fibre: ≥ 0.75 g/100kcal5  Energy: ≤ 48 kcal/100mL |
| **Water (plain)**  Includes natural (mineral) waters and other bottled waters, each of which may be non-carbonated or carbonated | Sodium: ≤ 20mg/100mL |
| **Potatoes (unprocessed)**  All unprocessed uncooked potatoes, without additives*, including uncooked peeled, sliced and/or chilled potatoes.* | All products without additives comply |
| **Potatoes (processed), pasta, noodles**  All kinds of potato products, pasta and similar grain products, used for a main dish. *Boiled/ fried potatoes, mashed potato, (wholemeal) pasta.* | SAFA: ≤ 1.1 g/100g  TFA: ≤ 0.1 g/100g  Sodium: ≤ 100mg/100g  Added sugar: not added  Fibre: ≥ 1.3 g/100kcal5 |
| **Rice**  All kinds of rice, used for a main dish. *Boiled, dried unpolished rice, white rice, whole grain rice*. | SAFA: ≤ 1.1 g/100g  TFA: ≤ 0.1 g/100g  Sodium: ≤ 100mg/100g  Added sugar: not added  Fibre: ≥ 0.7 g/100kcal5 |
| **Bread**  All kinds of bread or substitutes for bread with the exception of breakfast cereals. *Wheat bread, wholemeal bread, crisp bread, croissants, rye bread, speciality rolls, crackers.* | SAFA: ≤ 1.1 g/100g  TFA: ≤ 0.1 g/100g  Sodium: ≤ 500mg/100g  Added sugar: ≤ 13 en%  Fibre: ≥ 1.3 g/100kcal5 |
| **Grains and cereal products**  All kinds of grains and cereal products (other than bread and b*reakfast cereal), flour, breadcrumbs, binding agents, pancake mixes.* | SAFA: ≤ 1.1 g/100g  TFA: ≤ 0.1 g/100g  Sodium: ≤ 100mg/100g  Added sugar: ≤ 2.5g/100g  Fibre: ≥ 1.3 g/100kcal5 |
| **Breakfast cereal products** All kinds of breakfast cereal products *(muesli, cruesli, outs, cornflakes, rice crispies).* | SAFA: ≤ 13 en%  TFA: ≤ 0.1 g/100g  Sodium: ≤ 500 mg/100g  Added sugar: ≤ 20 g/100g  Fibre: ≥ 1.3 g/100kcal5 |
| **Meat, poultry, eggs (unprocessed)**  All kinds of unprocessed meat, poultry and eggs (including deep-frozen meat without further processing). *Beef, pork, turkey, egg.* | SAFA: ≤ 1.1 g/100g or ≤ 13 en%  TFA: ≤ 0.1 g/100g6  Sodium: ≤ 100 mg/100g  Added sugar: not added |
| **Processed meat, meat products and meat substitutes**  All kinds of processed meat/poultry, meat products and (vegetable) meat substitutes. *Ready-to-eat meatballs, spiced or salted meat (fresh or deep-frozen), salami, smoke-dried beef, grilled ham, tempeh, tofu, dairy-based meat substitute, fungus-based meat substitute.* | SAFA: ≤ 1.1 g/100g or ≤ 13 en %  TFA: ≤ 0.1 g/100g6  Sodium: ≤ 900 mg/100g  Added sugar: ≤ 2.5g/100g |
| **Fresh or fresh frozen fish, shellfish and crustaceans**  All kinds of unprocessed fish, crustaceans and shellfish (including deep-frozen fish without further processing). *Uncooked herring, cod (fresh or deep-frozen), fresh eel, lobster crab, mussel, shrimp.* | SAFA: ≤ 1.1 g/100g or  ≤ 30 % of total fat  TFA: ≤ 0.1 g/100g  Sodium: ≤ 100 mg/100g  Added sugar: not added |
| **Processed fish or fish products**  All kinds of processed fish, processed crustaceans and processed shellfish. *Cod parings, fried fillet of haddock, deep-fried octopus/ squid (cephalopod), pickled mussels, herring in tomato sauce, tinned sardines, tinned tuna, spiced or salted fish (fresh or deep-frozen).* | SAFA: ≤ 1.1 g/100g or  ≤ 30 % of total fat  TFA: ≤ 0.1 g/100g  Sodium: ≤ 450 mg/100g  Added sugar: not added |
| **Milk (-products)**  All kinds of milk and milk products. *E.g.: low fat milk, buttermilk semi-skimmed milk, full-cream milk, low fat yoghurt, semi-skimmed yoghurt, yoghurt drink, low fat custard, low fat fruit yoghurt, evaporated milk, coffee cream,*  *cream (for culinary use), milk substitutes like soymilk.* | SAFA: ≤ 1.4 g/100g  TFA: ≤ 0.1 g/100g6  Sodium: ≤ 100 mg/100g  Added sugar: ≤ 5 g/100g |
| **Cheese (-products)**  All kinds of cheese and cheese products. *20+ cheese, 30+ cheese, Edam, Brie 50+, 48+ Gouda cheese, blue cheese, gorgonzola, gruyère, soft herb cheese.* | SAFA: ≤ 15 g/100g  TFA: ≤ 0.1 g/100g6  Sodium: ≤ 900 mg/100g  Added sugar: not added |
| **Oils, fats and fat containing spreads**  All fats and oils used as spreads on bread and/or the preparation of food. *Oil (all types), low-fat margarine, margarine, butter, oil/fat products for roasting and frying (solid or liquid).* | SAFA: ≤ 30% of total fat  TFA: ≤ 1.3 en%6  Sodium: ≤ 1.3 mg/kcal  Added sugar: not added |
| **Main course**  All ready-to-cook meals that are intended to be eaten as main dish during lunch or dinner. *Meals for steaming, ready-to-cook meals, pizza, mixes for main dishes, deep-frozen meals* | SAFA: ≤ 1.1 g/100g or ≤ 13 en%  TFA: ≤ 0.1 g/100g or ≤ 1.3 en%6  Sodium: ≤ 2.2 mg/kcal  Added sugar: ≤ 2.5g/100g or ≤ 13 en%  Fibre: ≥ 1.25g/100kcal5  Energy: 400-700kcal/serving |
| **Filled sandwiches/rolls**  All ready-to-eat filled sandwiches/rolls | SAFA: ≤ 1.1 g/100g or ≤ 13 en%  TFA: ≤ 0.1 g/100g or ≤ 1.3 en%6  Sodium: ≤ 1.9 mg/kcal  Added sugar: ≤ 2.5g/100g or ≤ 13 en%  Fibre: ≥ 0.8g/100kcal5  Energy: ≤ 350 kcal/serving |
| **National deviation example** | |
| **Soft white cheese (Israel)**  Soft white spreadable cheeses with percentage moisture on a fat-free basis (MFFB) > 67%. *Cottage cheese, white cheese spreads* | SAFA: ≤ 2 g/100g  TFA: ≤ 0.1 g/100g6  Sodium: ≤ 400 mg/100g  Added sugar: not added |

1) Generic criteria are translated from population intake goals (1) as described in the paper: “Development of international criteria for a front of package food labelling system: international Choices Programme”.

2) Based on the product group classifications as used in food-based dietary guidelines in more than 20 countries Australia (2) Belgium (3), Caribbean (4), Canada (5), China (6), Denmark (7), Finland (8), France (9), Germany (10), Greece (11), Hungary (12), Malaysia (13), Mexico (14), Namibia (15), Netherlands (16), Philippines (17), Portugal (18), Singapore (19), Spain (20), Sweden (21), Turkey (22), UK (23), various countries (24, 25).

3) If possible the generic criteria were fixed per product group: either as en% or g/100g. However when this would lead to needless exclusion of low energy dense foods, both generic criteria (en% or g/100g) can be used.

4) Details on the rationales behind the product group specific criteria can be found below.

5) For each product group the fibre in a product has to come from ingredients products of the same product group.

6) Naturally occurring trans fat from meat or milk is excluded.

***Table 2. Overview of generic1 and product group specific criteria, including description of discretionairy product groups.***

| ***Product group*** | ***Overview Choices criteria2,3*** |
| --- | --- |
| **Soups**  All kinds of soups and broths. *Tinned soup, deep-frozen soup, soup in stand-up pouches, soup served by the catering industry* | SAFA: ≤ 1.1 g/100g  TFA: ≤ 0.1 g/100g  Sodium: ≤ 300 mg/100g  Added sugar: ≤ 2.5g/100g  Energy: ≤ 100 kcal/100g |
| **Meal sauces**  All sauces that constitute a substantial component of the meal (portion size > 35 g). *E.g. Pasta sauce, béchamel sauce, vegetable sauce, meat sauce, fish sauce, cheese sauce, mustard sauce, gravy.* | SAFA: ≤ 1.1 g/100g  TFA: ≤ 0.1 g/100g  Sodium: ≤ 450 mg/100g  Added sugar: ≤ 2.5g/100g  Energy: ≤ 100 kcal/100g |
| **Other sauces (on water basis)**  All sauces that constitute only a minor component of the meal (portion size < 35 g) without added emulsifying agent AND have a fat content < 10% w/w.  *E.g.* *Ketchup, soy sauce, chocolate sauce, fruit sauce, barbecue sauce.* | SAFA: ≤ 1.1 g/100g  TFA: ≤ 0.1 g/100g  Sodium: ≤ 750 mg/100g  Energy: ≤ 100 kcal/100g |
| **Other sauces (emulsions)**  All sauces that constitute only a minor component of the meal (portion size < 35 g) to which an emulsifying agent is added OR have a fat content ≥ 10% w/w.  *E.g. Mayonnaise, salad dressing, dip sauce, marinade, mustard, vinaigrette.* | SAFA: ≤ 1.1 g/100g & 30 % total fat  TFA: ≤ 0.1 g/100g & 1.3 en%  Sodium: ≤ 750 mg/100g  Added sugar: ≤ 13 en% & 2.5g/100g  Energy: ≤ 350 kcal/100g |
| **Snacks (including pastry, edible ice cream, sweet snacks and savoury snacks)**  All kinds of sweet, savoury, and sweet baked products intended to be eaten as a small snack between meals or as a minor component of a meal.  *E.g.* *Savoury products: potato crisps, popcorn; Sweet products: sweets, all types of chocolate, candy bars; Sweet baked products: biscuits, cookies, all types of cake and pastries. Ice cream: vanilla ice cream, sorbet, yoghurt ice, sorbet ice, milkshake.* | SAFA: ≤ 1.1 g/100g or ≤ 13 en%  TFA: ≤ 0.1 g/100g or ≤ 1.3 en%  Sodium: ≤ 400 mg/100g  Added sugar: ≤ 20 g/100g  Energy: ≤ 110 kcal/serving |
| **Beverages**  Liquid food products that are normally consumed from a cup, mug or glass (incl. products packed in portions in packaging, bottles, etc.), with the exception of dairy products and fruit juices.  *E.g. coffee, tea, (light) soft drinks, fruit drinks.* | SAFA: ≤ 1.1 g/100g  TFA: ≤ 0.1 g/100g  Sodium: ≤ 20 mg/100g  Energy: ≤ 20 kcal/100mL |
| **Bread toppings incl. hummus like products**  All kinds of food product that are ment to be put on bread/toast and not fall under earlier mentioned product groups. *E.G. jam, peanut butter, thunasalad, hummus, tahini* | SAFA: ≤ 13 en%  TFA: ≤ 1.3 en%  Sodium: ≤ 400 mg/100g  Added sugar: ≤ 30 g/100g |
| **All other products**  All kinds of food product that do not fall within any of the above mentioned product groups.  *E.g. baking product, seasonings, vinegar.* | SAFA: ≤ 1.1 g/100g or ≤ 13 en%  TFA: ≤ 0.1 g/100g or ≤ 1.3 en%  Sodium: ≤ 100 mg/100g or  ≤ 1.3 mg/kcal  Added sugar: ≤ 2.5 g/100g or ≤ 13 en% |

1) Generic criteria are translated from population intake goals (1) as described in the paper: “Development of international criteria for a front of package food labelling system: international Choices Programme”.

2) If possible the generic criteria were fixed per product group: either as en% or g/100g. However when this would lead to needless exclusion of low energy dense foods, both generic criteria (en% or g/100g) can be used.

3) Details on the rationales behind the product group specific criteria can be found below.

**PRODUCT GROUP SPECIFIC CRITERIA: DETAILED RATIONALES**

***Rationale All products comply****:*

*Fresh or fresh frozen fruit, vegetables and legumes, unprocessed potatoes; water*

Fruit, vegetables, legumes and potatoes are carriers of essential nutrients. Consumption should be stimulated. The same is the case for plain water. *Thus the main rationale is alignment with recommendation to consume more fresh fruit and vegetables and drink plain water.*

***Rationales SAFA criteria:***

*Fish, fish products, fats and oils and emulsion-based sauces (30% total fat)*

These are products high in fat. Applying the generic SAFA criterion (13 en%) would imply that none of these products would qualify for a Choices stamp. Because the quality of fat is more relevant than the SAFA quantity, the SAFA criterion for these products is expressed as percentage of total fat, rather than percentage of energy. This way consumption of unsaturated fatty acids is stimulated. *In summary: the main rationale is alignment with recommendation to consume sufficient unsaturated fatty acids.*

*Milk products (1.4g/100g):*

With the current generic insignificancy level for SAFA (1.1 g/100g) semi-skimmed milk does not comply. International legislation (26) and seasonal influences determine the fat content of the milk. Semi-skimmed milk consumption is important for intake of calcium, protein and B vitamins. Therefore it has been agreed to keep the SAFA criterion for milk products at 1.4g/100g. *In summary: the main rationale is alignment with recommendation to consume semi-skimmed milk.*

*Cheese (15g/100g):*

The percentage of cheeses for the combined European test database that comply with the generic criteria is zero (see ***Appendix 3a.*** Detailed characteristics per product group). The discriminating nutrients are sodium and saturated fat. Saturated fat content is determined by the content of milk (milk fat consists of 2/3 SAFA), which is a legally required ingredient in cheese (26, 27). The criterion of 15g SAFA/100g allows reduced-fat cheese to comply. *Thus* *the main rationale is to allow healthier choices within the product group cheese.*

*White soft cheese, Israel (2g/100g):*

Data from Israel indicated that these products are an important source of essential nutrients (such as calcium and B-vitamins) in the Israeli diet (See ***Appendix 1.*** Israeli Case study). There was not enough data available that indicate this is also the case for other parts of the world, especially Europe. Therefore it was decided that this criterion would (for now) be applied to Israel only. *Thus the main rationale is alignment with recommendation to consume dairy products.*

***Rationales sodium criteria***

*Water (plain) and beverages (20mg/100mL):*

All plain waters comply with the criteria. Mineral waters can be high in sodium levels. To ensure that sodium content does not increase above undesirable levels the *20mg/100mL* is used as sodium criterion, which is the European directive (28). *Thus the main rationale is alignment with recommendation to limit intake of salt.*

*Bread and breakfast cereal products (500mg/100g):*

Few breads and breakfast cereals comply with the generic sodium criteria according to the combined European test database (see ***Appendix 3a.*** Detailed characteristics per product group). Therefore, a product group specific criterion for sodium was set for bread, based on the sodium benchmarks from available food standards (29, 30). The same cut-off was also used for breakfast cereal products. *In summary: the main rationale is to stimulate innovation to lower the salt content in these product groups.*

*Processed meat (900mg/100g) & processed fish (450mg/100g):*

The percentage of processed meat and fish (products) complying with the generic criteria is relatively low (see ***Appendix 3a.*** Detailed characteristics per product group). A product group specific criterion for processed meat was set based on available food standards (31, 32).Processed fish contain less salt therefore the cut-off was set at 50% of the processed meat criterion. *Thus the main rationale is to stimulate innovation to lower the salt content in these product groups.*

*Cheese (900mg/100g):*

As mentioned above the discriminating nutrients in cheese are sodium and saturated fat. Sodium is needed for the cheese making process and for conservation (33). The lower the fat level, the more sodium is needed. The proposed level of 900 mg/100g was seen as a realistic target. *Thus the main rationale is to stimulate innovation to lower the salt content in this product group.*

*White soft cheese, Israel (400mg/100g):*

Data from Israel indicated that these products are an important source of essential nutrients (such as calcium and B-vitamins) in the Israeli diet (See ***Appendix 1.*** Israeli case study). There was not enough data available that indicate this is also the case for other parts of the world. Therefore it was decided that this criterion would (for now) be applied to Israel only. *Thus the main rationale is to stimulate innovation to lower the salt content in this product group.*

*Main course (2.2mg/kcal) & filled sandwiches (1.9mg/kcal):*

When applying the generic criterion for sodium (1.3 mg/kcal) few main courses would comply (see ***Appendix 3a.*** Detailed characteristics per product group). Thus the proposed sodium criterion was set at 2.2 mg/kcal for main course, which is the median sodium level in the product group of main courses in the combined European test database. For filled sandwiches, the sodium criterion was determined by the weighted average of the criteria for bread and toppings assuming that a sandwich consists of 60% bread and 40% topping. Average energy densities were assumed to be 2 kcal/g for bread and 2.5 kcal/g for bread toppings. The calculation of the criteria is as follows:

- 60% x Sodium criterion bread (500mg/100g = 2.4mg/kcal) + 40% x Sodium criterion bread toppings (400mg/100g = 1.6mg/kcal) =  1.9 mg/kcal

This still resulted in few complying products for both groups; however experiences in the Netherlands show that these are not too strict to motivate producers to innovate. There are examples on the Dutch market that fulfil the criteria. This illustrates that the combined European test database is of limited value for these product groups. *In summary: the main rationale is to stimulate innovation to lower the salt content in these product groups.*

*Soups (300mg/100g), meal sauces (450mg/100g) & sauces water/emulsion based (750mg/100g):*

Applying the generic sodium criteria to these products, which are relatively salty, would result in very few products that can comply. Thus, to stimulate innovation of products that remain acceptable for consumers regarding sodium levels, a product group specific sodium criterion was set at levels based on various food standards (29, 30, 34). *In summary: the main rationale is to stimulate innovation to lower the salt content in these product groups.*

*Snacks & bread toppings (400mg/100g):*

Sodium criterion for snacks was set in such a way that around 5% of the savoury snacks would comply (***Appendix 3a.*** Detailed characteristics per product group). This same level was applied to the product group bread toppings. *Thus the main rationale is to stimulate innovation to lower the salt content in these product groups.*

***Rationales added sugar criteria***

*No added sugar: fruit juices; processed potatoes, pasta, noodles; rice; unprocessed meat, poultry; unprocessed & processed fish; cheese (products); oils and fats:*

To prevent any unnecessary addition of sugar, there is no added sugar allowed in all product groups mentioned above. *Thus the main rationale is alignment with recommendations to limit intakes of added sugar.*

*Breakfast cereals (20g/100g):*

Breakfast cereals are commonly consumed across the globe. Sugar is a very common ingredient and levels are relatively high, especially in products targeted to children (35, 36). *In summary: the main rationale is to stimulate innovation to lower the added sugar content in this product group.*

*Milk products (5g/100g):*

Gradually lowering added sugar without the use of artificial sweeteners is challenging. Current developments show that innovation in dairy products in the Netherlands, a country that is working with the criteria for 3 years cannot go below 5 g added sugar per 100g, without use of sweeteners because of taste. *In summary: the main rationale is to stimulate innovation to lower the added sugar content in this product group.*

*Snacks (20 g/100g):*

A sugar criterion was needed in order to prevent that high sugar-containing sweets would qualify for a health stamp and to assure that daily intake of added sugar could not exceed maximal daily recommendations (< 25 en%) as set by the US Institute of Medicine (37).

Calculation of maximal sugar levels for snacks (applying 20 g/100g):

- Per 100g, a snack may contain 20 g sugar. For an average 45 g snack, this will be 9 g sugar
- 3 times a day a sweet snack x 9 g sugar  27 g sugar from snacks

Sugar from the rest of the diet (applying the generic added sugar criterion: <13 en%):

- Total energy intake (2000 kcal – 330kcal (snacks) = 1670 kcal) of which 13 en% of added sugar (generic criterion): 54.3 g sugar

Maximal daily energy intake from added sugar in diet according to Choices:

- 27 g + 54.3 g = 81.3 g (x 4 kcal) = 325.2 kcal
- **=** 16.3% of total daily energy (2000kcal), which is below the IOM upper limit (25 %energy) (37)

*In summary: the main rationale is alignment with recommendations to limit intakes of added sugar.*

*Bread toppings, sandwich fillings, including hummus like products (30g/100g):*

For this heterogeneous product group there was a need to define criteria as g/100g, in order not to stimulate innovation by addition of energy. The added sugar criterion was set at 30g/100g to allow a few low sugar marmalades to comply. *Thus the main rationale is to stimulate innovation to lower the added sugar content in this product group.*

***Rationales fibre criteria***

There are generic fibre criteria for the following product groups: processed fruit and vegetables; processed potatoes, pasta and noodles; bread; grains and cereal products; breakfast cereal products. All these product groups are important sources of fibre. Fibre must come from ingredients that are already present in the food: To assure inclusion of cell wall polysaccharides of vegetables, fruit and whole grains, the health effects of which have been clearly established, and exclusion of synthetic, isolated or purified oligosaccharides with diverse, and in some cases unique, physiological effects (38, 39). Product group specific fibre criteria have been set for fruit juice, rice and main course. For the other groups the generic fibre criterion will be applied.

*Fruit juice (0.75g/100kcal):*

Fruit contains 1.75 times more energy when compared to vegetables. This is based on median values of fresh fruit and vegetables in the combined European test database (see ***Appendix 3a.*** Detailed characteristics per product group). This can be explained by higher intrinsic sugar levels in fruits. Generic criterion for fibre is 1.3 g/100 kcal for processed fruit and vegetables. Fibre criterion for fruit juices is set at 0.75 g/100kcal, which is 1.3 (g/100kcal) divided by 1.75. *Thus the main rationale is alignment with recommendation to increase fibre intake.*

*Rice (0.7g/100kcal):*

The generic fibre criterion 1.3g/100kcal is too strict for rice. Based on the indicator foods in the European test database, it was decided to set the fibre criterion at 0.7 g/100kcal, so that brown rice would comply (***Appendix 3b***. Indicator foods). *Thus the main rationale is to allow choice within the product group “ rice”.*

*Filled sandwiches (0.8g/100kcal):*

For filled sandwiches, the fibre criterion was determined by the weighted average of the criteria for bread and toppings assuming that a sandwich consists of 60% bread and 40% topping. Average energy densities were assumed to be 2 kcal/g for bread and 2.5 kcal/g for bread toppings. The calculation of the criterion is as follows:

- 60% x Fibre criterion bread (1.3 g/100kcal) =  0. 8 g/100kcal. No fibre criterion was set for toppings.

*Thus the main rationale is alignment with recommendation to increase fibre intake.*

***Rationales energy criteria***

Energy criteria have been established for two product groups within the basic product groups, namely the “main courses” and “filled sandwiches”, as these are major contributors to the daily energy intake. Also for fruit juice an energy criterion has been set, as there is a concern that fruit juices also contribute substantially to energy intakes. Furthermore, energy criteria have been set for all products in the non-basic product groups. These foods do not substantially contribute to the supply of essential nutrients, but as they are eaten frequently they are important suppliers of energy.

***Table 3. Overview of recommendations for daily energy intake, main courses and snacks***

| ***Target group*** | ***Daily energy recommendation1*** | ***Recommended energy from main courses2*** | ***Recommended energy from snacks2*** |
| --- | --- | --- | --- |
| ***Elderly*** | 1800 kcal/d | 486 kcal/serve | 108 kcal/serve |
| ***Adult women*** | 2000 kcal/d | 540 kcal/serve | 120 kcal/serve |
| ***Adult men*** | 2500 kcal/d | 675 kcal/serve | 150 kcal/serve |
| ***Children 2-12*** | 1546 kcal/day |  | 95 kcal/serve |
|  |  | **Energy criterion: 400-700 kcal/serve** | **Energy criterion:**  **110 kcal/serve** |

***1*** Based on references (40,41)

***2*** Based on calculation shown in ***Figure 1***

*Main courses (400-700kcal/serve), sandwiches (350kcal/serve) and snacks (110kcal/serve):* The energy criteria are based on recommended energy intakes (see ***Table 3***). Since 10% is recommended to come from beverages (42), this leaves 90% of the total daily energy recommendation for meals and snacks. The remaining energy is allocated as follows, based on certain assumptions about meal patterns: Breakfast (20%) Lunch (30%), Dinner (30%), 3x Snack (20%), see ***Figure 1.*** For main courses the energy criterion was set at 400-700 kcal/meal. The lower level (400 kcal) is to assure sufficient energy intake for vulnerable groups (elderly). The higher level (700 kcal) is to control for too high energy intake. For sandwiches the energy criterion was set at 350 kcal as that is half of maximal total energy for lunch/dinner. For snacks the average energy recommendation for adults (women, 120kcal/serving) and children (95kcal/serving) was calculated (rounded: 110 kcal/serving). *In summary the main rationale is alignment with recommendation for energy intake.*

Remaining energy1,800 kcal/day

Breakfast

(20% en%)

Lunch

(30 en%)

Dinner

(30 en%)

540 kcal/serving

3x Snack

(20 en%)

120 kcal/serving

2,000 kcal/day

Recommended energy intake for women

< 200 kcal/day

Day’s beverage intake

(10 en%)

***Figure 1. Overview of recommended energy intake during the day: basis for energy criteria (as calculated for adult women)***

*Fruit juices (48kcal/100mL)*:

Pure (100%) fruit juice contributes to fruit intake. However there is evidence that fruit juice consumption contributes to high energy intake, weight gain and diabetes (43, 44). Therefore, while initially there was no differentiation between fruits and fruit juices, there now is a new focus on limiting fruit juice intake. Because sugar levels are determined by Codex and EU fruit directive (45, 46) there is little room to innovate. Therefore an energy criterion has been set at 48kcal/100mL to exclude the fruit juices that are high in energy.This level is similar to the 3rd quartile of the European test database for fruit juices (***Appendix 3a.*** Detailed characteristics per product group). *Thus the main rationale is alignment with recommendation to limit energy intake from fruit juices.*

*Soups (100kcal/100g), sauces (100 or 350 kcal/100g):*

It was decided that non-basic product groups should be minimized in their contribution to daily energy intake. Therefore energy criteria were set for all non-basic product groups. For the soups and sauces this was based on the following: Energy density is correlated with water content (47). For products with high water content (>50% w/w) it was decided to use 100kcal/100g as criteria. While for products with low water content (<50% w/w) this is 350kcal/100g). See ***Table 4***. *Thus the main rationale is alignment with recommendation to limit energy intake from soups and sauces.*

***Table 4. Overview of water content and energy criteria in non-basic product groups***

| ***Non-basic product group*** | ***Average water content1***  ***(% w/w)*** | ***Energy criteria [kcal/100g]*** |
| --- | --- | --- |
| ***Soups***  ***Meal sauces***  ***Sauces emulsions***  ***Sauces non-emulsions***  ***Snacks***  ***Beverages*** | > 50  > 50  < 50  >50 | 100  100  350  100  110  20 |

***1***Based on references (48, 49).

*Beverages (20 kcal/100mL):*

There are clear concerns that any higher kcal beverage will adversely affect energy intake, weight gain and related health problems (50, 51). Beverages should not contribute more than 10% to daily energy intake (42; see ***Figure 1***). However people would not stop drinking energy containing drinks. Therefore reformulation should be stimulated into the healthier direction. Currently, regular energy containing drinks contain 10-12 g/100g of sugar (=40-48 kcal/100g). As a first step, but without forcing manufacturers to use artificial sweeteners, was set at 20 kcal/100g or 100mL. This represents 5 g of sugar. The intention is that this will be further lowered. With the use of sweeteners, lower levels of energy in beverages can be reached. There is however a considerable number of consumers who do not consume sweeteners (52, 53) and there are possible concerns about the effects of excessive sweetness on long-term habituation to sugar and sweet foods (54, 55). Therefore it was decided to also aim for a less sweet taste. When consumers are getting used to this, it will also benefit sugar levels in other product groups, such as milk products. As the energy in beverages mainly comes from sugar, it was decided that there is no additional need for a sugar criterion for this group. The percentage of complying products is 36%. This is relatively high. These, however are exclusively coffee, tea, flavoured water and light beverages.

The changes from the original Netherlands-based criteria

- All insignificancy levels are changed to 5% of the WHO recommendations for total daily diet/100g
- The recommendation for sodium was 2400mg/d, this is now 2000mg/d, aligned with WHO recommendations (Joint Consultation FAO/WHO, 2003).
- There is an agreed procedure for addition of new product groups, or change of criteria.
- New product groups have been defined: water, rice, breakfast cereals, bread toppings & (only for Israel) white soft cheese. The Israeli case is included as an example of a national adaptation of criteria.
- For existing product groups, specific criteria have been added for fruit juices (energy) and revised for fish products (SAFA), main dishes (fibre), soups (sodium) & beverages (energy).
- Fibre only counts when it comes from ingredients that are already naturally present in the food.

.

**OTHER Online Supplementary Material to the paper:**

***“Development of international criteria for a front of package food labelling system: international Choices Programme”***

**Appendix 1. Israeli case study**

*This document gives an overview of the discussion points raised by the Israeli Scientific Committee that were brought as input to the meeting of the International Scientific Committee. This is an example of how local dietary habits and food composition are brought into the discussion.*

**Appendix 2. Development of a test database on food composition**

*This document describes how the test database on food composition was prepared: Foods needed to be classified according to the Choices product group classification. In addition, assumptions needed to be made for serving sizes for snacks and for missing data (TFA and added sugar).*

**Appendix 3a. Detailed characteristics per product group**

*In an introductory file an overview of the test database is given. The other files contain key-nutrient content and data descriptions for all products groups.*

**Appendix 3b. Indicator foods**

*This file contains indicator foods on separate worksheets for all product groups. Indicator foods are typical foods that comply or do not comply with the criteria. Both data source and discriminatory nutrients (for which these foods do not comply) are given.*

**REFERENCES**

1. Joint Consultation FAO/WHO. Diet, Nutrition and the Prevention of Chronic Diseases. Report of a Joint FAO/WHO Expert Consultation. FAO/WHO. WHO Technical Report Series 916. 2003. Geneva, World Health Organisation.

2. National Health and Medical Research Council; Dietary Guidelines for all Australians. <http://www.nhmrc.gov.au/publications/synopses/dietsyn.htm> last accessed October 2009 (Australia)

3. Vlaams Instituut voor Gezondheidspromotie; De actieve voedingsdriehoek. <http://www.vig.be/content.asp?nav=themas_voeding&selnav=205> last accessed October 2009 (Belgium)

4. The South-eastern Michigan Dietetic Association Caribbean; Islands Food Pyramid. <http://www.semda.org/info/pyramid.asp?ID=8> last accessed October 2009 (Caribbean)

5. Health Canada; Canada's food guide. <http://www.hc-sc.gc.ca/fn-an/food-guide-aliment/index-eng.php> last accessed October 2009 (Canada)

6. Chinese Nutrition Society; Food Based Dietary Guidelines <http://www.fao.org/ag/humannutrition/nutritioneducation/fbdg/49850/en/chn/> last accessed October 2009 (China)

7. Ministeriet for familieog for forbrugeranliggender; Kostråd og Kostkompasset. <http://www.altomkost.dk/forside.htm last accessed October 2009> last accessed October 2009 (Denmark)

8. National Nutrition Council; Finish Nutrition Recommandations 2005. <http://www.mmm.fi/ravitsemusneuvottelukunta/Kuvat_ENG.htm> last accessed October 2009 (Finland)

9. Les Agences françaises de sécurité sanitaire: le Bateau Alimentaire. <http://www.lexpress.fr/informations/le-bateau-alimentaire_641424.html> last accessed October 2009 (France)

11. Supreme Scientific Health Council. Hellenic Ministry of Health. Dietary guidelines for adults in Greece. <https://www.nut.uoa.gr/english/index.asp?page=30201> last accessed October 2009 (Greece)

10. Deutsche Gesellschaft fur Ernahrung, Die Dreidimensionale Lebensmittelpyramide. <http://www.dge.de/> last accessed October 2009 (Germany)

12. Ministry of Health of Hungary Dietary Guidelines to the Adult population of Hungary. <ftp://ftp.fao.org/es/esn/nutrition/dietary_guidelines/hun.pdf last accessed October 2009> (Hungary)

13. Nutrition Society of Malaysia, Malaysian Food Based Dietary Guidelines. [http://www.nutriweb.org.my/downloads/dietary_english.pdf last accessed October 2009](http://www.nutriweb.org.my/downloads/dietary_english.pdf  last accessed October 2009) (Malaysia)

14. Secretary of Health, National Institute of Medical and Nutrition Science  **Guías Alimentarias de México.**<http://www.fao.org/ag/agn/nutrition/education_guidelines_mex_en.stm> last accessed October 2009 (Mexico)

15. Ministry of Health and Social Services. Food and Nutrition Unit. Food and nutrition guidelines for Namibia. <ftp://ftp.fao.org/es/esn/nutrition/dietary_guidelines/nam.pdf last accessed October 2009> (Namibia)

16. Voedingscentrum, Schijf van Vijf. http://www.voedingscentrum.nl/nl/eten-gezondheid/gezond-eten.aspx. last accessed October 2009 (Netherlands)

17. The National Nutrition Council (NNC) FNRI food pyramid. <http://www.fao.org/ag/agn/nutrition/education_guidelines_phi_en.stm last accessed October 2009> (Philippines)

18. Rodrigues SSP, Franchini MPH, Graça BP and de Almeida MDV. (2006) A New Food Guide for the Portuguese Population: Development and Technical Considerations. *J Nutr Educ Behav* **38**, 189-195. (Portugal)

19. Nutrition Works, Healthy Diet Pyramid. <http://www.nutrition.com.sg/he/hepyr.asp last accessed October 2009> (Singapore)

20. Extension Systems, Dietary Guidelines for the Spanish population. [http://www.aces.edu /urban/spanish/pyramid.html](http://www.aces.edu/urban/spanish/pyramid.html) last accessed October 2009 (Spain)

21. National Food Administration, the Food Circle. [http://www.slv.se/upload/nfa/documents/food_nutrition/The%20Food%20Circle.pdf](http://www.slv.se/upload/nfa/documents/food_nutrition/The Food Circle.pdf) last accessed October 2009. (Sweden)

22. Ministry of Health of Turkey/Hacettepe University Department of Nutrition and Dietetics. Dietary Guideline for Turkey. http://www.bdb.hacettepe.edu.tr/dokumanlar/dietaryguidelines.pdf

Last accessed December 2009. (Turkey)

23. British Nutrition Foundation, Healthy Eating a Whole Diet Approach. [http://www.nutrition.org.uk /upload/BNF%20Healthy%20Eating(5).PDF](http://www.nutrition.org.uk/upload/BNF Healthy Eating(5).pdf) last accessed October 2009 (United Kindom)

24. World Health Organisation (2003). Food based Dietary Guidelines in de European Region. <http://www.euro.who.int/Document/E79832.pdf> last accessed October 2009

25. Painter J, Ray JH, Lee YK (2002). Comparisons of international food guide pictorial representations. *J Am Diet Assoc* **102**, 483-489.

26. Council Regulation (EC) (2007). No 1234/2007 of 22 October 2007 establishing a common organisation of agricultural markets and on specific provisions for certain agricultural products (Single CMO Regulation) Appendix 12-13.

27. Codex General Standard for cheese (1978), *Codex Stan* 283-1978.

28. Council Directive 98/83/EC (1998) On the quality of water intended for human consumption. *Official Journal of the European Communities*, November 1998. <http://eur-lex.europa.eu/LexUriServ/LexUriServ.do?uri=OJ:L:1998:330:0032:0054:EN:PDF>

29. National Food administration (2009) The Keyhole symbol. [http://www.slv.se/upload/nfa/documents/food_regulations/keyhole_2009.pdf Last accessed December 2009](http://www.slv.se/upload/nfa/documents/food_regulations/keyhole_2009.pdf  Last accessed December 2009).

30. Health Check program (2009). Heart & Stroke foundation. http://www.healthcheck.org/sites/default/files/editor/HealthCheck_NutrientCriteria_Retail_October09.pdf Last accessed December 2009.

31. National Heart Foundation of New Zealand (2002). Pick theTick, The Food Information Program. Guidelines for Tick Approval. The National Heart Foundation of New Zealand 2002. Internet: [http://www.heartfoundation.org.nz](http://www.heartfoundation.org.nz/) Last accessed January 2009

32. Food Standards Agency (2005). Effects of reducing salt in processed food on the population's salt intake - the salt model <http://www.food.gov.uk/healthiereating/salt/saltmodel last accessed October 2009>.

33. Mistry VV (2001). Low fat cheese technology. *Int Dairy J* **11**, 413–422.

34. Kinnunen TI (2000). The Heart symbol: a new food labelling system in Finland. *Nutrition Bulletin* **25**, 335-339.

35. Popkin BM (2008). The World Is Fat: The Fads, Trends, Policies, and Products That Are Fattening the Human Race. New York, Avery-Penguin Group.

36. Rudd Centre for food and obesity (2009). Evaluating the Nutrition Quality and Marketing of Children’s Cereals <http://www.cerealfacts.org/media/Cereal_FACTS_Report.pdf>

37. Institute of Medicine (2002). Dietary Reference Intakes for Energy, Carbohydrate, Fat, Fatty acids, Cholesterol, Protein, and Amino Acids. 2002. Washington, The National Academies Press.

38. Cummings JH, Mann JI, Nishida C, and Voster HH (2009). Dietary fibre: an agreed definition. *Lancet* **373**, 365-366.

39. Pascoe DA, Fulcher RG. (2008). Biochemistry and compartmentalization of cereal grain components and their functional relationship to mammalian health. In: Marquant L and Jacobs DR (eds) Whole grains and health. Ames: Blackwell Publishing. pp 89-165.

40. Joint FAO/WHO/UNU Expert Consultation. Human Energy Requirements (2001). Food and Nutrition Technical Report Series. Rome: FAO.

41. Health Council of the Netherlands (2002). Dietary reference intakes: energy, proteins, fats, andvdigestible carbohydrates. The Hague: Health Council of the Netherlands, 2001; publication no. 2001/19ER (corrected edition: June 2002).

42. Popkin BM, Armstrong LE, Bray GM, Caballero B, Frei B and Willett WC (2006). A new proposed guidance system for beverage consumption in the United States. *Am.J.Clin.Nutr* **83**, 529-542.

43. Sanigorski AM, Bell AC, Swinburn BM (2007). Association of key foods and beverages with obesity in Australian schoolchildren. *Public Health Nutr* **10**, 152-157.

44. Odegaard AO, Koh WP, Arakawa K, Yu MC, Pereira MA. (2010). Soft Drink and Juice Consumption and Risk of Physician-diagnosed Incident Type 2 Diabetes: The Singapore Chinese Health Study. *Am J Epidemiol* **171**, 701-708.

45. Codex General Standard for fruit juices and nectars (2005), *Codex Stan* 247-2005.

46. Council Directive 2001/112/EC of 20 December 2001 (2001). Relating to fruit juices and certain similar products intended for human consumption.

47. Crowe TC, Fontaine HL, Gibbons CJ, Cameron-Smith D, Swinburn BA (2004). Energy density of foods and beverages in the Australian food supply: influence of macronutrients and comparison to dietary intake. *Eur J Clin Nutr* **58**, 1485-91.

48. Stichting Nederlands Voedingsstoffenbestand (2006). NEVO food composition database.Den Haag: Voedingscentrum.

49. Foods Standards Agency (2002). McCance and Widdowson's the Composition of Foods: Summary Edition (6th Edition). London: Food Standards Agency.

50. Malik VS, Schulze MB, Hu FB (2006). Intake of sugar-sweetened beverages and weight gain: a systematic review. *Am J Clin Nutr* **84**, 274-288.

51. Vartanian LM, Schwartz MB, Brownell KD (2007). Effects of soft drink consumption on nutrition and health: a systematic review and meta-analysis. *Am J Public Health* **97,** 667-675.

52. Euromonitor international (2009). trade sources/national statistics. <http://www.euromonitor.com/research_methodology.aspx last accessed October 2009>

53. Mattes RD, Popkin BM (2009). Nonnutritive sweetener consumption in humans: effects on appetite and food intake and their putative mechanisms. *Am J Clin Nutr* **89**, 1-14.

54. Avena NM, Rada P, Hoebel BG (2008). Evidence for sugar addiction: behavioral and neurochemical effects of intermittent, excessive sugar intake. *Neurosci Biobehav Rev* **32**, 20-39.

55. Avena NM, Rada P, Hoebel BG (2009). Sugar and Fat Bingeing Have Notable Differences in Addictive-like Behavior. *J Nutr* **139**,623-628.
