# Supplementary material for: Development of international criteria for a front of package food labelling system: the International Choices Programme
Source: PubMed Central journal article supplement — Eur J Clin Nutr. 2011 Jun 22;65(11):1190–200. doi: 10.1038/ejcn.2011.101 (PMC3208753; doi:10.1038/ejcn.2011.101), 2011-06-22
Supplement: ejcn2011101x7.pdf [file ejcn2011101x7.pdf]

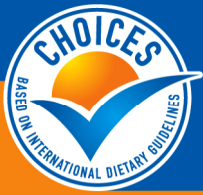

## Terms of Reference International Scientific Committee

Proposal February 2008

### Introduction

Article 4 of the Standing Orders of the Choices International Foundation states the following regarding the Scientific Committee:

#### **Scientific Committee**

*4.1 Pursuant to article 11, paragraph 2 of the Articles, the Board has established a scientific committee (the "Scientific Committee").*

*4.2 The main objective of the Scientific Committee is to safeguard the quality of the global benchmarks by providing adequate scientific guidance.*

*4.3 It is a requirement that the Scientific Committee is strictly independent from the other bodies of the Foundation. The chairman of the Scientific Committee shall serve as scientific advisor to the Board.*

*4.4 The Board will prepare Terms of Reference for the Scientific Committee and its members.*

The Terms of Reference referred to in sub clause 4 are established on the following pages.

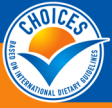

## Composition

- The Board will appoint the members of the Committee, as well as its chairman.
- The Committee will have 8 to 14 members (including the chairman) of different nationalities and from different regions.
- Members should have a high scientific level, knowledge of international developments in their field.
- The Committee will be composed in such a way, that expertise is available in the following areas: nutrition, food technology, consumer behaviour.
- Members will commit themselves to the Committee for a period of three years, after which the Board may decide to invite parting members for another three year period.

## Independence

- Membership of the Committee is in a personal capacity.
- Members shall guard their independent position in the Scientific Committee.
- Members shall not advise individual companies on the application of the Choices criteria to their products.
- Members will submit a declaration of independence, stating their other functions and relationships with industry and governments. These relationships will be kept by the chairman in a publicly available register.
- Members do not receive a fee for their work in the Committee. Their expenses will be reimbursed.

## Duties

- To review periodically the qualifying criteria of the Choices Programme, and recommend amendments to the Board.
- To recommend specific variations and exemptions in the application of the qualifying criteria, e.g. for specific products or countries.
- To report in a transparent way on the considerations on which decisions regarding the qualifying criteria are based.
- To advise on further development of the Choices Programme.
- To advise on research aimed at monitoring and evaluation of the Choices Programme.
- On the request of the Board, to make recommendations on the application of the qualifying criteria to specific product evaluations.
- On the request of the Board, to deal with specific questions and issues raised by the participating companies.



- In coordination with the Board, to represent the Choices International Foundation in (scientific) fora.

## **Duties of the chairman**

- To chair the meetings of the Committee.
- To attend Board meetings as an advisory member.
- To report the proceedings of the Committee to the Board.
- To keep a register of financial relationships of the Committee's members with industry and governments.

## **Working procedures**

- The Committee will meet once a year, and more often if needed.
- Inbetween meetings, the Committee will communicate via electronic means, including a web-based platform that is specifically designed for the Committee.
- The Committee will be supported by a secretary.
- The meetings and internal communication of the Committee are confidential; its recommendations are public.
- The Committee will decide by majority of votes.
- On the request of the Board, advisory members from the participating companies can attend the Committee's meetings. These do not have voting rights.
- The Committee can set up sub-committees which can include experts from participating companies.
